# Supplementary material for: Super Enhancer-Mediated Upregulation of HJURP Promotes Growth and Survival of t(4;14)-Positive Multiple Myeloma
Source: Oxford University Press journal article supplement (doi:10.1158/0008-5472.can-21-0921), 2021-12-10
Supplement: can-21-0921_supplementary_table_4_suppst4.docx [file can-21-0921_supplementary_table_4_suppst4.docx]

**pGL3-1.1 (Sequence-1)**

AAGTGAAGAACGACATCAATGCTGCTGGGGAGTCCGAGGAGCTGGCTAATGAGTACGAGACCCGGGCTGTTGGTGAGTCCACAGTGTGGAATGCTGTGGTGGGCGCGGATCTGCCATGTGGCACAGACATTGCCAGCGGCACTCATAGACCAGATGGTGGAGGTCCGTGGCATGTCCAAGCTCCCCAGTCTGATTGAGGGCTGCAGACCACAAGGTCTGGATGCGACAATCTCCTTGGTCCTGGCACATATGGAATTTTCCAAGAATGAATGTGGGAAATCTTGGGCTCTCTGATCCCATGGCCACCCAGGGCCATACCCAGGCCCAGTTCTAAGCAACTCAGGGAGCACTGGACTACTTTTTTTTGTGGGGGGGGGGGGTGTTTCTGGATGCCGTTACAACATTGTGACAGGGCTGAGATTTTACCTGACTTGTGCCCTAACCAGTTAGCCTGCCAGTTTCATATGCACACACTGCCAGAGGACCCAGCCCCTGGGCCTGCGACACTCATGGTTTCTTACTCATGGCAAAAGCAGCAGCCTGAGTAGCATCTGGGATGCTTCCCCTTGCCTCGGTTCCCAAGGGGTAACTCGAATAACAGTTGCCCTGCAGCTCCCTGAAGTTAGGACATGCTGAGCTTCTATCAGGGCTGCAGCTGAGATTACTTATTGCCTGGAGTGGACGATACTGCACTAAGCATTGCTCTCCTGGCATGTCTCAGGACGCCTGACTGCTGTTTGCTATTCAGTCCTCGAACAAAGCTTGCCAGTGCCCTTTGCACAGAGGCCTCGATCATTCAGGAAGGTGAGAAATCCAGAACCGATTACCTCTAAACAGCATTTTAAATGAGAATTTCAGGCCTGCTCAGTTTTTTCCATTTTCACTTGAGTTTTAAGTTTGCAACGAGGTATTTGCATCCAGGTTTGTCTAGTGTCTTATCAAATGTAAACATGCTCATGAGTTTAGCTTGTCCATGTTGGAAAAAAGATGTCTAATTATTTCTTTTAATTTATTAAAATTTCAAAGCAGTTTATTTCTGGATAATTAGGCAATGGCTCCTAATAGTTTTACTGTAAAAAAATTTCCCTGAGGATCTACACTGCAATTTCTTTGTCATTAGGTGATGAAATGTAAGCACACACTAATGCAATAGATCAGTGTTTCTTTTTTTTTTTTTTTTGAGGTGGAGTTTCGCTCTTGTTGCCCAGGCCGGAGAACAATGGTGTGATCTCAGCTCACTGCAAGCTCCGCCTCCTGGGTTCAAGCGATTCTCCTGCTTCAGCCTCCTGAGTAGCTGGGATTACAGGCGCATGCCACCACACCCGGCTAATTCTTTGTATTTTTAGTAGAGACGGGGTTTTGCCATGTTGGGCAGACTAGTCTCGAACTCCTGACCTCAGGTGATCCACACTCCTCGGCCTCCCAAAGTGCTGGGATTACAGGTGTGAGCCACTGCGCCCAACCTTTTTTTTCCTCTGTGCCTTATCTGCCAAACAACCTTGCCAAGAAGGCGTAGAGTTCAAATGAGATGGAGGAAGGGCTGCTCTGATTACGGGGGGGTCGGGGGGCGGCGGTGGGGAGGTGCAGAAGGTTAGATCCCTTCTCAGTGGCTGAGGCTCTTCTGCCTGAGCCCAGATGGAAGCCCATCAAAGAGAGGGGCTCCCTCTGTCCAATGCAGCTCAATCCAGTGAGCAGTTATTGTCACCTGCTGCCATCAGGAGCTCTGCTGGGTTTGTCTTGCCTTCAGAAAATTCTGCTATTCAGTAACAAATTGTGTTGTGATGGCATTTTCTATGCCTTTTGTAAGAATGGACTCACGCACAGGCTATTTTTGGATTCAGGGGTTGGCTGGGGGTGGAAGCAGGACAGTTTCGGTCATGTGCAGCTCTTACACCAGCTTCTCTCTGTGCTGATGTCGCTGTAGAGCTGTTCACTGAGTGTTACAGCAGCGATGAAGACTTGGCAGAACAGCTGCTGGTCTATTCCTGTGAAGCctagttgtcacgtcctgcacgacgctagcgagatccggccccgcccagcgtcttgtcattggcgaattcgaacacgcagatgcagtcggggcggcgcggtccgaggtccacttcgcatattaaggtgacgcgtgtggcctcgaacaccgagcgaccctgcagcgacccgcttaacagcgtcaacagcgtgccgcagatctaagtaagcttggcattccggtactgttggtaa

**pGL3-1.2 (Sequence-2)**

GCCCAGCCTGGGGTCCAGGTAAACCATACTCAGCCACCAGACCACACGGCCAGAAATGGGGCTTTTATGTCAGATGCTACTAGCAGCATTAAACAATAGTAAAAACAAACCTTATTCTCCAATATAAAAGCCATAGAAGGAGTGGTTTGGTGATGATGTGGGAGATGGCCAAGTATAGGCATTGGTCGAAATCCATGCTTTAAGAGATGGTGCAGGACAAAGAATATTCTTTGAGTTTCCACTAAGCAAACAACACAGCATCATAATTATGAGCTGTGTCTCTGGATCCCACTGCCTGGGTCTCCATCCGCTGTACCCCTAATGAAGTGTGTGATGATGGGCCAAGTTACATGAGCTCTCCGAGTATTAGTTTCCTCATCTACAAAATGGGGATAGCAGCAGATAAAGGGTTATTGTGAAGATTTAAGGAGATAATATGTGAAAGGTGTTGGTCCTTTATTTAGCTATTGCTATTGCAGTTATTATTAGTAGTGATAGCAGTAGGGAAACTATTGTGAAATGGGTAAAAGCTGTCTAGAGGCTTTCTGCACTGAAGTGAATGAATCGTAGTTTGCACCTGGTGTCTTAGGCTGCAGAGCAGAGCTTTTCACCCACAGTTCCAGTTGTAGAAATGTGGGTGTGAGAAGGGGAGGGGAAAAGGAAGAGATGGAGAGACCAACGCTTGTCAGCCACAGCTGCTATACACTAGGCCACATTTCATCTTCACAGCACCTGTGGGGATGGGTGCCATCCCATTTCACTGAGGAGGATGCAGGAGCTCAGAGAGGTTCTGGAATGTCCTTCCAGCTTGCACTGCTGTGAAGTAGCAGCACTAGGATTGGCTCTCATGTTGATTGCCTGCAACTTTCATGTCCTAGACTTTCCATGATATCATACAGCCAGATGTTTACGAACAAAACCCATTTACTACTGCAACTAAGCTAGACTAAATGAGAGCATTGATCCATGACAAGGAGCATGCGGAGAGCGTCTTGCTATTGCTCAGTTTTAGCCTCTGCTGCAGTGTAGTGGGTAGAAGTAAGGCTGGTGCTGGAGTCGGGGTGTGCCTGGGAGGCTGGGGTGGCTTCCCAGGTGGGTCACACTCTACTTATGTCTTCCTGGGCCCCAAACCCTATCTCGCTTGTGTCCCAGAACTTGGGGCCCTGGGGAGTCTGGCTTTTACTCCTGTCCAGGTTCACAGATCCTGAGGTTTCAATCAGATGCCAGGTCATTCATTTCACTGAAAATCTTACTACCAGGCCACAGGATCACCCAGTGGGCCTGGCCAGGGAGTTTTCTTTCTATAGTCAGGGTGCTGTGTGGGGTCAGAATGCTGCCAGTGACCATGGAACCCAACCCAGTGCTGTAATTTCCGTGACTGGGGCCTGACGGTGATGCTCAGTGATGGCCTGGCGTCTGCATCACCCCAGCAGAATAGGAGAGTGAGGAAGACTAAGCACTGCCTGTCTCCGTTGCCCGCCACCCCCGCACCCCCTCCCAAGAAGCAAACCCCAAAGTGAGGATGTCAATACAAGGAGTTTATTCTGGAGGTGAACCTGGGAAGCACAGGAGGCACCAGTGAGACAGGGAAGGGACAGGGACAGACAAGATGTGCTGATGAGGAGGTTGCCACTGTGGGCACCCGGGGCTCAGCCTGCCAGGGACCTCTGGGAAACTGTAGAACCAGCTTCAGTGTTGCCCGGCCCAGTGCAAAGCAGTCGGCCATTTACCCACCAACTGCAATTGGTTGTTTGTGGAAAGCTGACACCTTATTCCAGGACACTAGTCCTCATGGGTCAAGCACGCACCTGGCTGGAGTAGCCCTAGGCAGGGGCCCTCAGAAGCAGCCATCCTCCTCCAAGGGCAGGGCAGGTGCCCAGGGCCAGAGGGGTGCATGTCAGTCCCAGCCCTCCTAGCTAGCACTGAGAAGGCCCTGGGTTTCCCTTTTCCTCTGTTCCTGAGACACACCAAACTCCTTCTGCTTGACGGGCTATTTTTTGAGAGATGTGGGTCCTTTGATGTGGTCGAGTCTATGCTCCCCTGCTAACTCTCAGAGCTACTGTGAGTTTTCTAATTTCCACCTTTGTGAAAGTCCCTTCTGTCCCAACGTCAAGGGTTGATACAGTCTGGGGAGAGCTTTTACATGCATTTCAGCCTGAATTGATGTCAAGACATCAACAGTCTCTCCCTTCCGAACTTCCTTTTAGTTTCCTGACAAAAGCATCACCTGTCTTTCTCCAGAAATGAATCGTTGGGGACCCTACAGGTAGTACTGGCTGTGCCTGTGAATTTGTGATCATTGAAGACAAAGGAGCCAGAAAGATACTTGTTTAAACTTACCTAATAAAAATGAGAGTTGGATAAAAATTCCTAGGTTTATTGAATTTGAACGTACACAACTATTACTTTAAAGTGCACATAATGCAACTCAGAAAAAGACTTAAAATAAAACCAAGTTTGGCCAGGCATGGTGGCTCACACCTGTAATCCCAGCACTTTGGGAGGCCGAGGCGGTGGATCACCTGAGGTCGGGAGTTTGTGACCAGCCTGACCAACATGGAGAAATCCCGTCACTACCAAAAATACAAAAAAAAAAAAAATTAGACAGGAATGGTGGCACATTCCTGTAATCCCAGCTACTCGGGAGGCTGAGGCAGGAGAATCGCTTGAACCTGGGAGGTGGAGGTTGTGGTGAGCTGAGATTGCACCATTGCACTCCAGCCTGGGCAGCAAGCGTGAAACTCCGTCTCAAGAAAAAAAACAAAAAACCAAGTTTTAAATTGTTTTTTTTAACACTGCCCCTTAGAATCCAGGCAACTGGTATAAAAGAATAATGACATTAATTCAAAGAGCTGTGTATTTTGGGGAAAGTGTGGGGCGGGGAAGAAAGTTTGCATGGCATCCTGCATACAATTGTGTTAATAAGGACCTTGTTCTCTGTCTTTGTTTCCCTGTAGAATTTTCTTTCTAAGCAATGGTATGGAGAGATTTctagttgtcacgtcctgcacgacgctagcgagatccggccccgcccagcgtcttgtcattggcgaattcgaacacgcagatgcagtcggggcggcgcggtccgaggtccacttcgcatattaaggtgacgcgtgtggcctcgaacaccgagcgaccctgcagcgacccgcttaacagcgtcaacagcgtgccgcagatctaagtaagcttggcattccggtactgttggtaa
